# Supplementary material for: A highly selective fluorescence “turn-on” sensor for Ca2+based on diarylethene with a triazozoyl hydrazine unit
Source: Royal Society of Chemistry journal article supplement (doi:10.1039/c8ra06039h), 2018-01-01
Supplement: c8ra06039h1.pdf [file c8ra06039h1.pdf]

## Supporting materials

### A highly selective fluorescence “turn-on” sensor for Ca<sup>2+</sup> based on diarylethene with a triazoloyl hydrazine unit

Zhen Wang, Shiqiang Cui\*, Shouyu Qiu and Shouzhi Pu\*

*Jiangxi Key Laboratory of Organic Chemistry, Jiangxi Science and Technology Normal  
University, Nanchang 330013, PR China*

\*Corresponding author: E-mail: [cuisq2006@163.com](mailto:cuisq2006@163.com) (S. Cui); [pushouzhi@tsinghua.org.cn](mailto:pushouzhi@tsinghua.org.cn) (S. Pu); Tel./Fax: +86-791-83831996.

### Contents

**Fig. S1.** <sup>1</sup>H NMR of **1o**.

**Fig. S2.** <sup>13</sup>C NMR of **1o**.

**Fig. S3.** HRMS spectra of **1o**.

**Fig. S4.** Cyclization kinetics of **1o** (A), and cycloreversion kinetics of **1c** (B) in acetonitrile solution ( $2.0 \times 10^{-5}$  mol L<sup>-1</sup>) at room temperature.

**Fig. S5.** Fatigue resistance of **1o**.

**Fig. S6.** The emission intensity at 482 nm gradually increased until the amount of Ca<sup>2+</sup> reached 2.2 equiv. ( $\lambda_{\text{ex}} = 340$  nm).

**Fig. S7.** Fluorescence spectra ( $\lambda_{\text{ex}} = 340$  nm) changes of **1c** ( $2.0 \times 10^{-5}$  mol L<sup>-1</sup> in acetonitrile) induced by Ca<sup>2+</sup> (0-2.2 equiv.).

**Fig. S8.** The binding constant of **1o** with Ca<sup>2+</sup> was calculated to be  $8.86 \times 10^3$  L · mol<sup>-1</sup>.

**Fig. S9.** The limit of detection (LOD) for Ca<sup>2+</sup> is  $2.49 \times 10^{-8}$  mol L<sup>-1</sup>.

**Fig. S10.** HRMS spectra of **1o'** in acetonitrile.

**Fig. S11.** Fluorescence emission intensity ( $\lambda_{\text{ex}} = 340$  nm) of **1o** (A), and **1o'** (B) over different pH values in CH<sub>3</sub>CN:H<sub>2</sub>O (9:1, v/v).

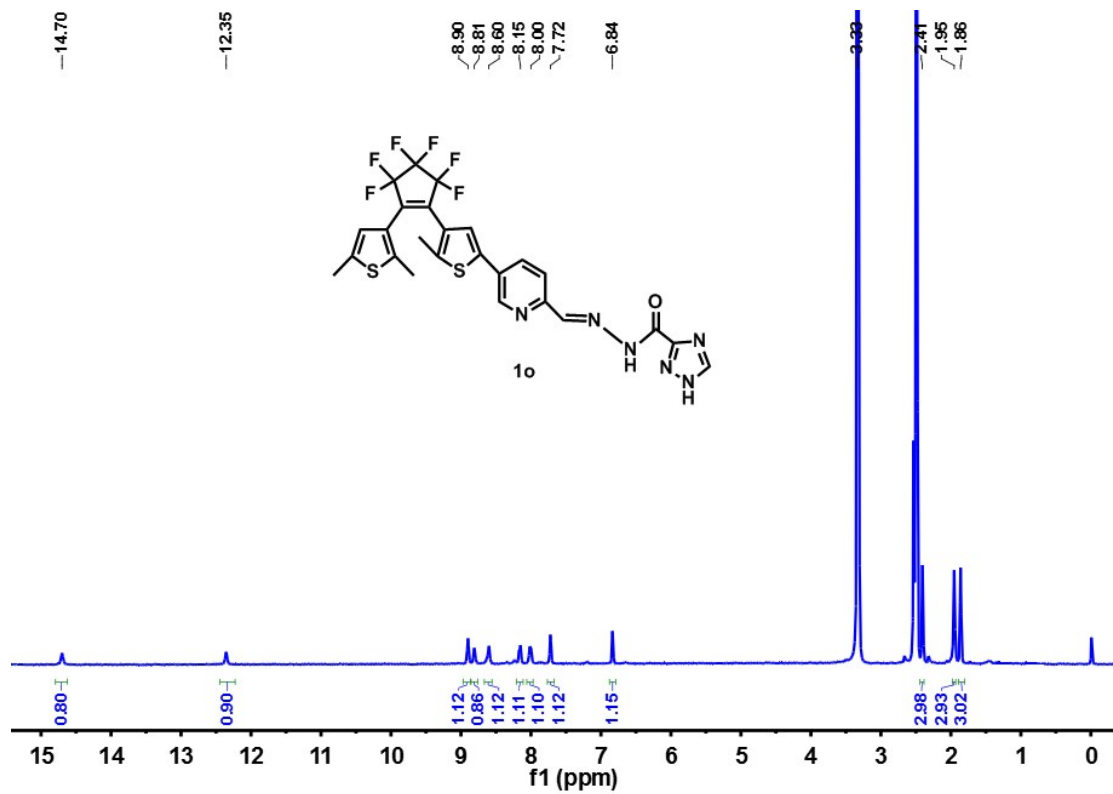

Fig. S1.  $^1\text{H}$  NMR of **1o**.

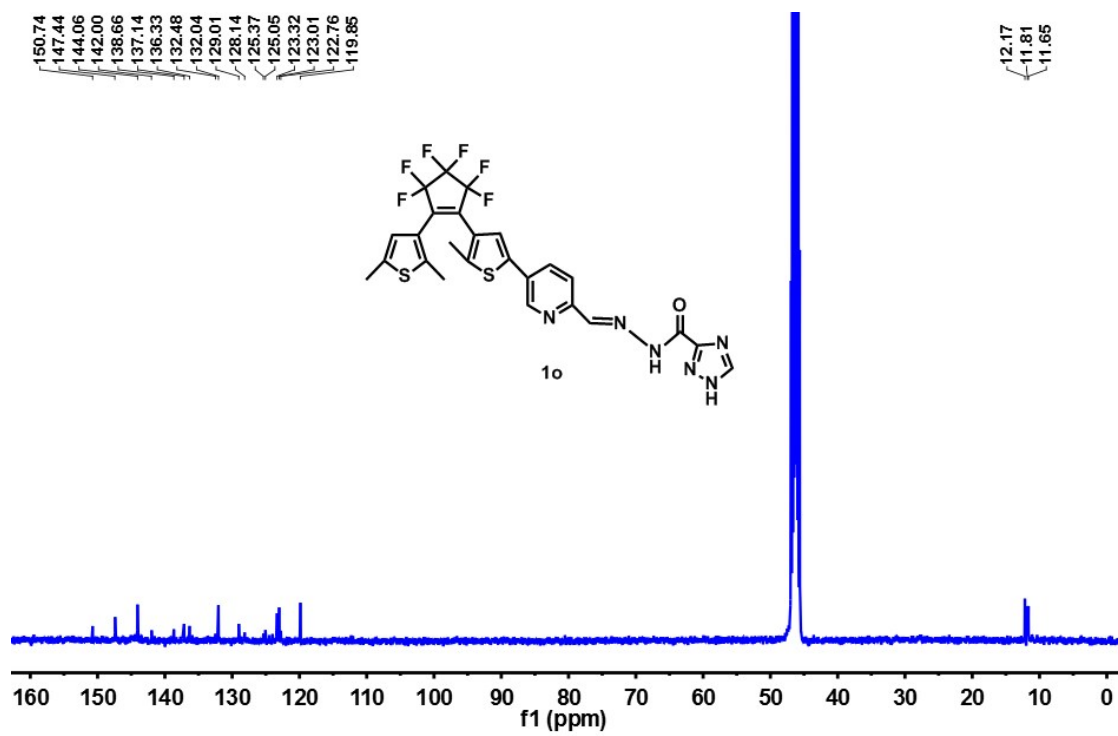

Fig. S2.  $^{13}\text{C}$  NMR of **1o**.

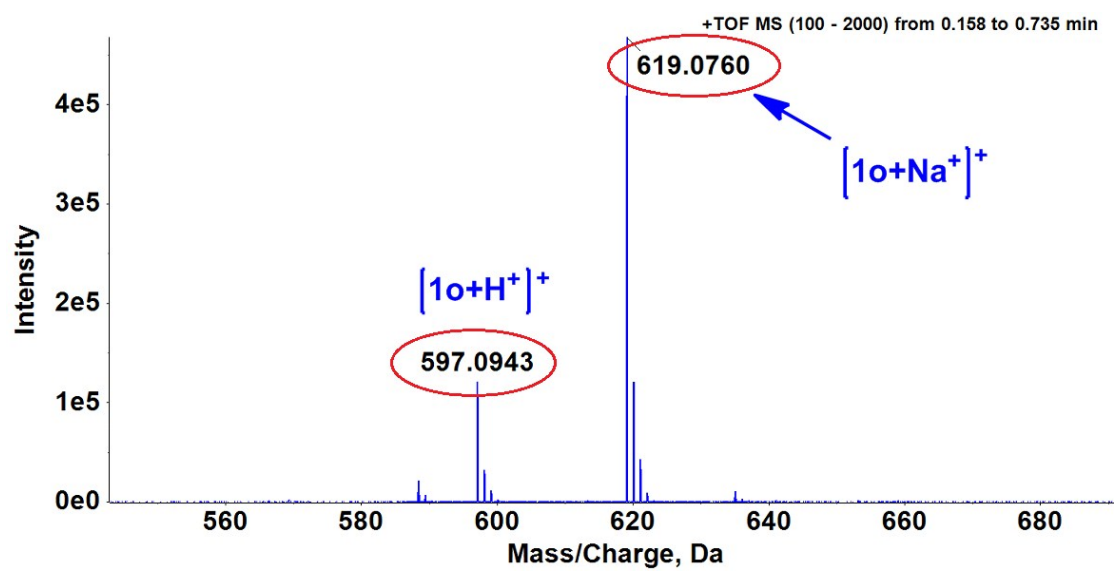

Fig. S3. HRMS spectra of **1o**.

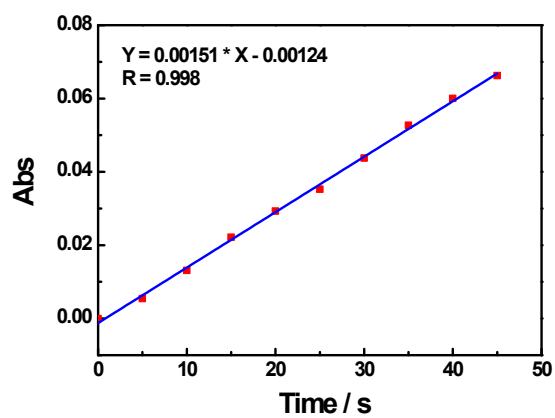

(A)

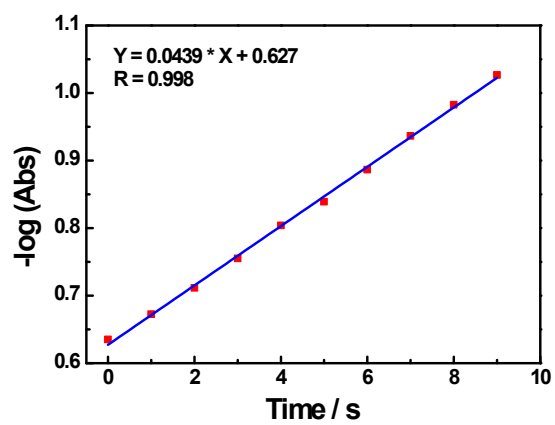

(B)

**Fig. S4.** Cyclization kinetics of **1o** (A), and cycloreversion kinetics of **1c** (B) in acetonitrile solution ( $2.0 \times 10^{-5} \text{ mol L}^{-1}$ ) at room temperature.

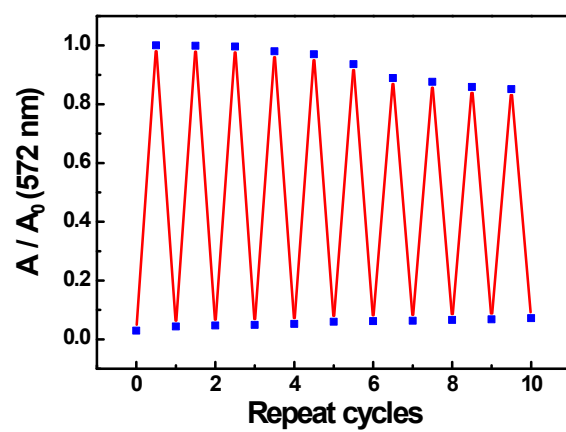

**Fig. S5.** Fatigue resistance of **1o**.

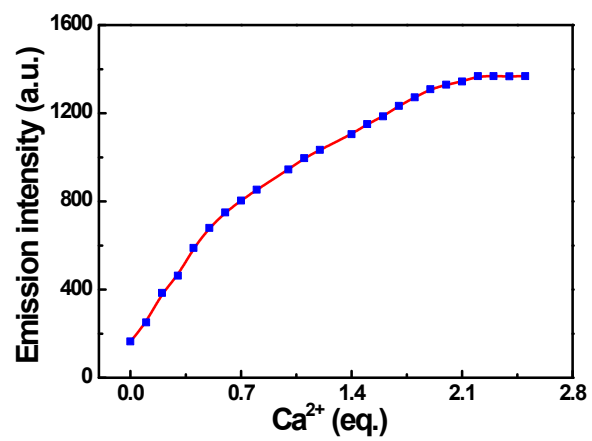

**Fig. S6.** The emission intensity at 482 nm gradually increased until the amount of Ca<sup>2+</sup> reached 2.2 equiv. ( $\lambda_{\text{ex}} = 340 \text{ nm}$ ).

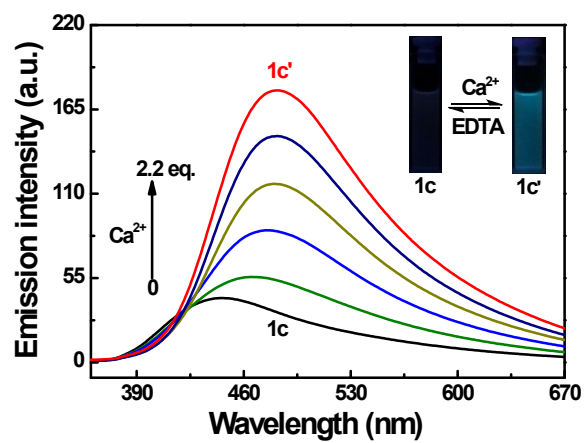

**Fig. S7.** Fluorescence spectra ( $\lambda_{\text{ex}} = 340 \text{ nm}$ ) changes of **1c** ( $2.0 \times 10^{-5} \text{ mol L}^{-1}$  in acetonitrile) induced by  $\text{Ca}^{2+}$  (0-2.2 equiv.).



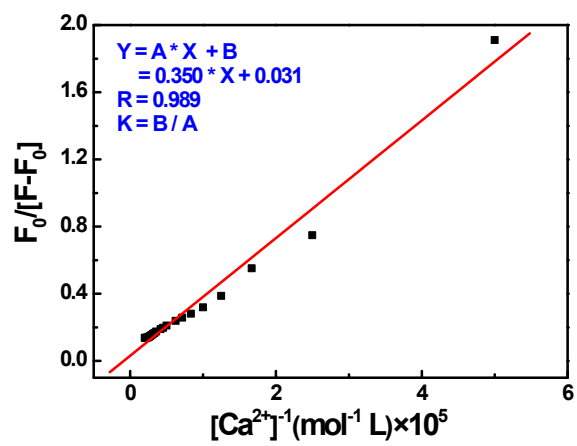

**Fig. S8.** The binding constant of **1o** with  $Ca^{2+}$  was calculated to be  $8.86 \times 10^3 \text{ L} \cdot \text{mol}^{-1}$ .

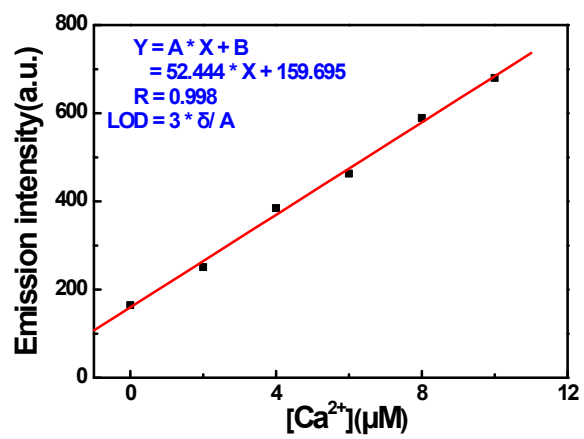

Fig. S9. The limit of detection (LOD) for Ca<sup>2+</sup> is  $2.49 \times 10^{-8}$  mol L<sup>-1</sup>.

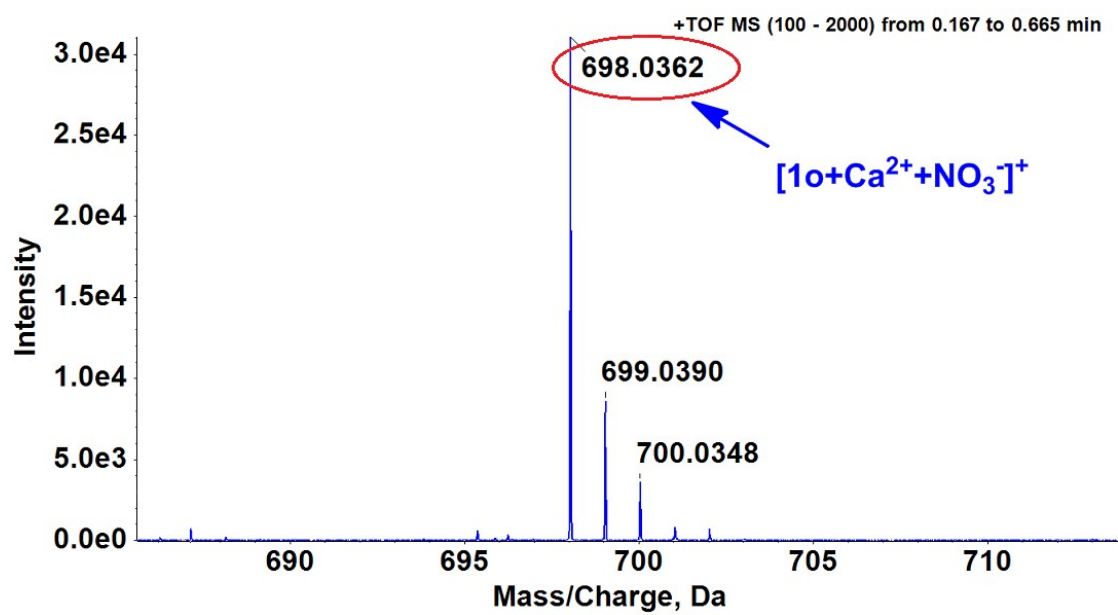

Fig. S10. HRMS spectra of **1o'** in acetonitrile.

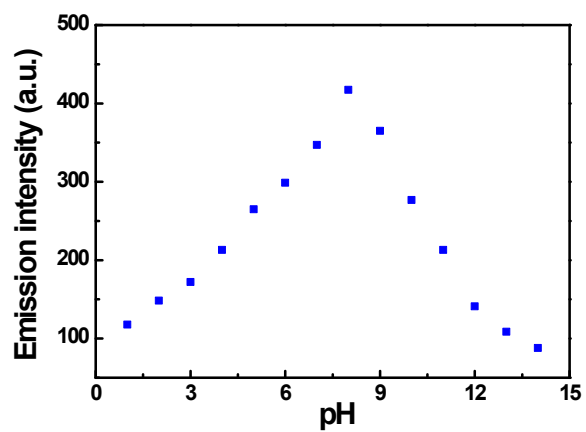

(A)

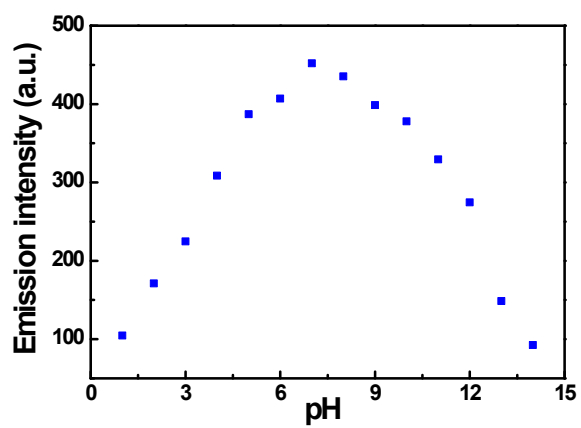

(B)

**Fig. S11.** Fluorescence emission intensity ( $\lambda_{\text{ex}} = 340 \text{ nm}$ ) of **1o** (A), and **1o'** (B) over different pH values in  $\text{CH}_3\text{CN}:\text{H}_2\text{O}$  (9:1, v/v).
